# Supplementary material for: Engineering Au single-atom sites embedded in TiO2 nanostructures for boosting photocatalytic methane oxidation
Source: Royal Society of Chemistry journal article supplement (doi:10.1039/d4na00947a), 2025-01-01
Supplement: d4na00947a1.pdf [file d4na00947a1.pdf]

### SUPPORTING INFORMATION

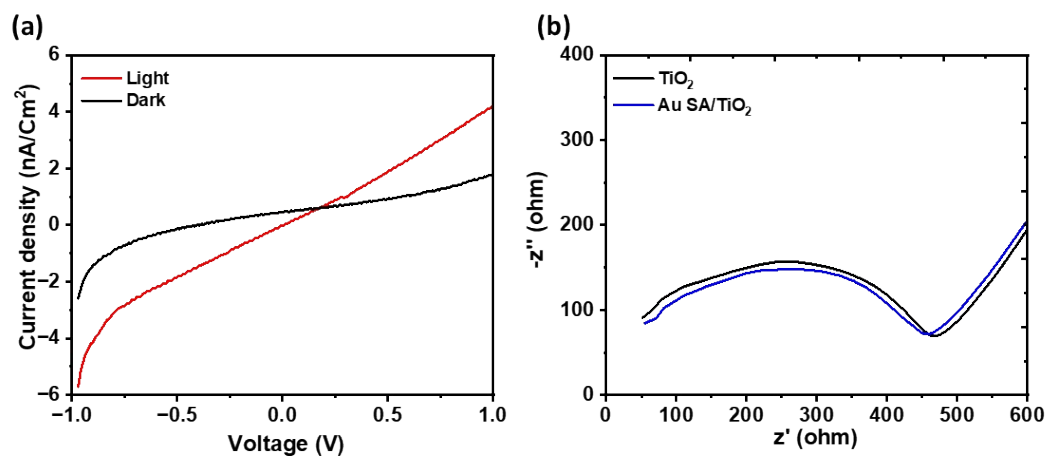

**Figure S1.** (a) I-V characteristics of Au SA/TiO<sub>2</sub> and (b) EIS Nyquist plots of pure TiO<sub>2</sub> and Au SA/TiO<sub>2</sub> catalysts.

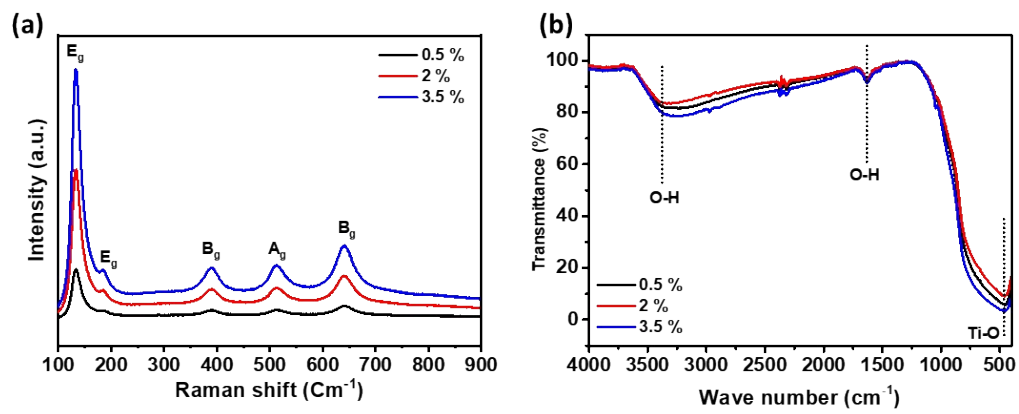

**Figure S2.** (a) the Raman and (b) FTIR spectrum of Au SA/TiO<sub>2</sub> with different Au loading contents.

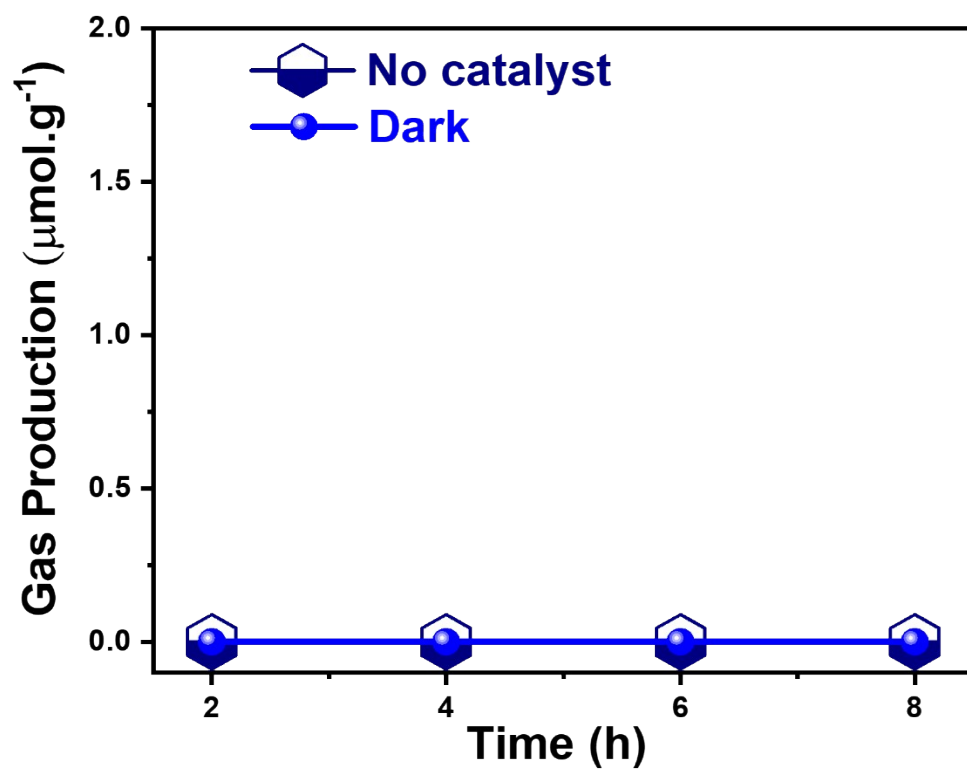

**Figure S3.** The blank experiments of methane oxidation of Au SA/TiO<sub>2</sub> under different conditions.

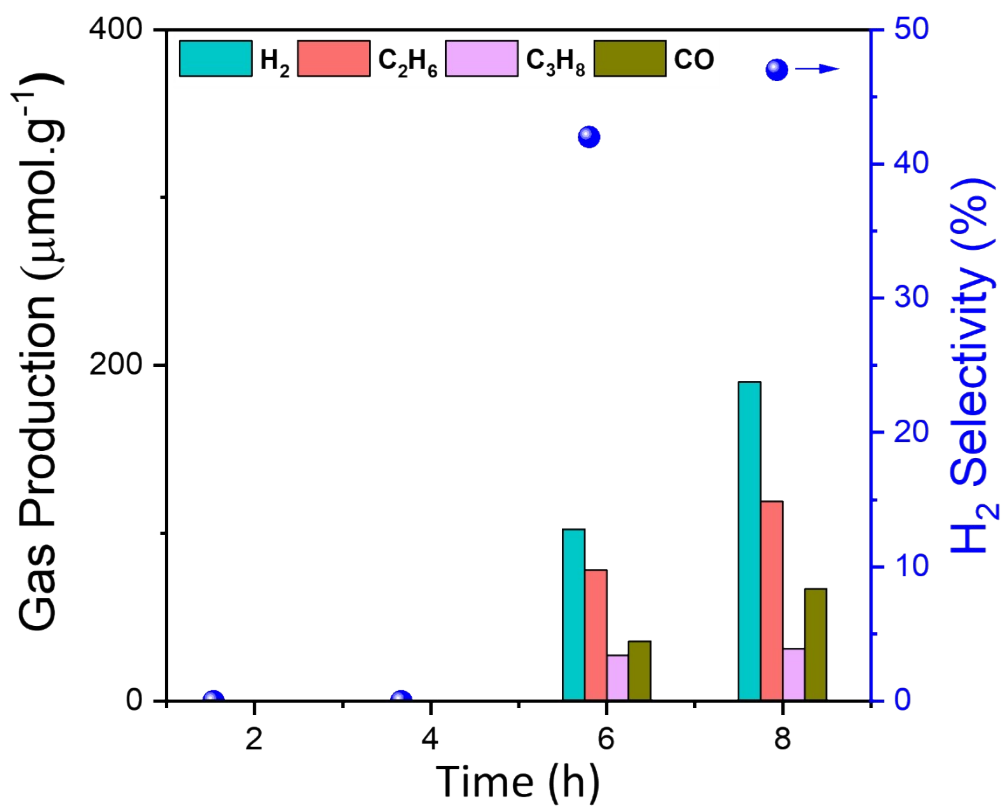

**Figure S4.** Photocatalytic methane oxidation performances and the H<sub>2</sub> selectivity as a function of reaction time over pure TiO<sub>2</sub>. Reaction condition: 50 mg catalyst CH<sub>4</sub>: CO<sub>2</sub> = 3 : 1 (stand pressure ratio), Xenon lamp 300W.

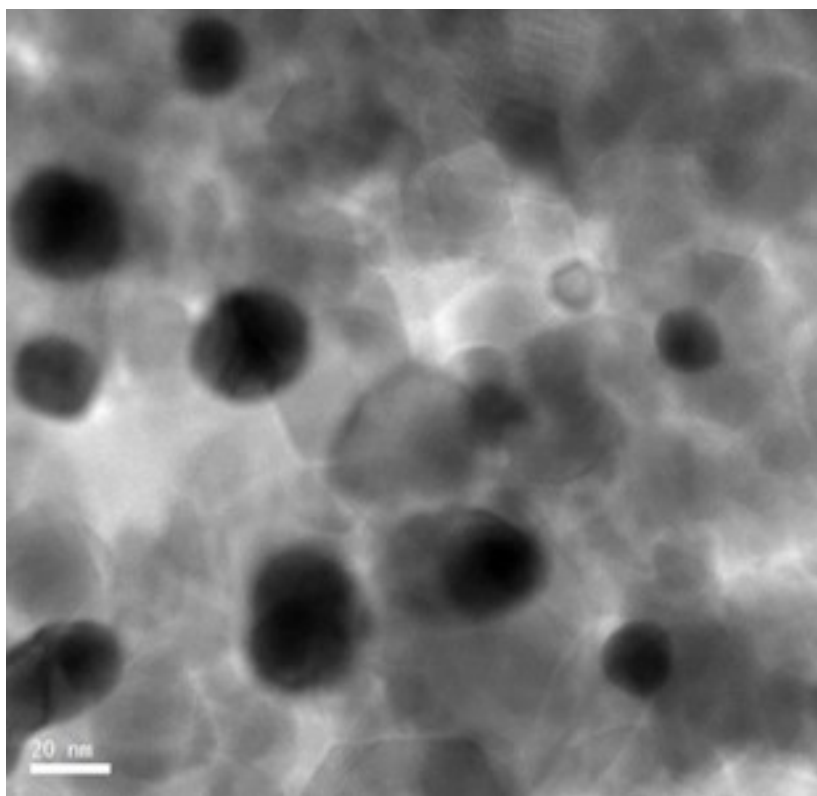

**Figure S5.** The TEM image of Au NPs/TiO<sub>2</sub>.

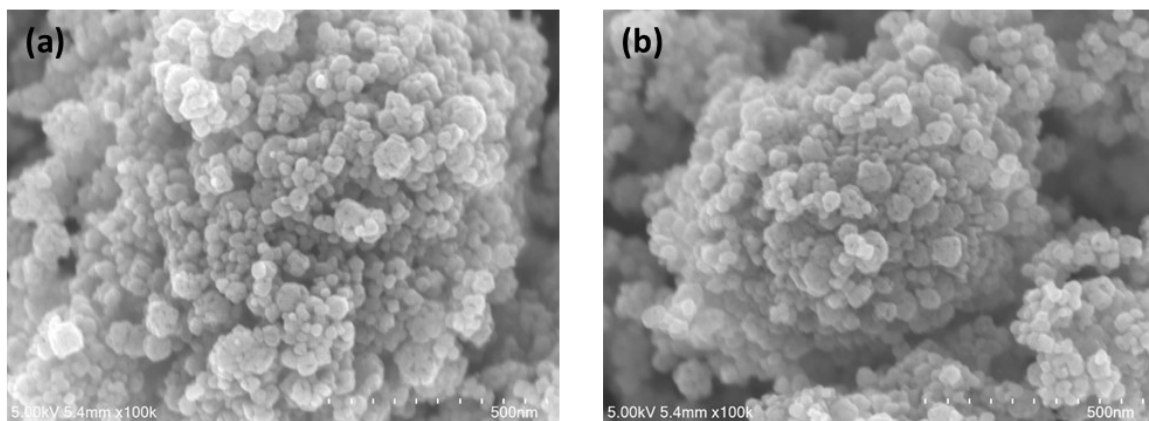

**Figure S6.** SEM of Au SA/TiO<sub>2</sub> (a) before and (b) after reactions.
